# Supplementary material
Source: PubMed Central journal article supplement (PMC2948809)
Supplement: mmc1.pdf [file mmc1.pdf]

## Supplemental Data

### WDR11, a WD Protein that Interacts

### with Transcription Factor EMX1, Is Mutated in Idiopathic

### Hypogonadotropic Hypogonadism and Kallmann Syndrome

Hyung-Goo Kim, Jang-Won Ahn, Ingo Kurth, Reinhard Ullmann, Hyun-Taek Kim, Anita Kulharya, Kyung-Soo Ha, Yasuhide Itokawa, Irene Meliciani, Wolfgang Wenzel, Deresa Lee, Georg Rosenberger, Metin Ozata, David P. Bick, Richard J. Sherins, Takahiro Nagase, Mustafa Tekin, Soo-Hyun Kim, Cheol-Hee Kim, Hans-Hilger Ropers, James F. Gusella, Vera Kalscheuer, Cheol Yong Choi, Lawrence C. Layman

#### TABLE OF CONTENTS

1. Figure S1: Semi-quantitative RT-PCR analysis in rat tissues
2. Figure S2: Evolutionary conservation of the residue Lys978
3. Figure S3: RT-qPCR and western blot analysis of t(10;12)
4. Figure S4: Overlay of 1PGU and WDR11
5. Figure S5: Protein-protein interaction region of WDR11
6. Figure S6: Two zinc ion binding sites of 1PGU
7. Figure S7: Glu, His and Asp residues in the model of WDR11 in the vicinity of the proposed zinc position based upon 1PGU
8. Table S1: SNPs of *WDR11* (NM\_018117.11) found in IHH/KS patients and normal controls
9. Table S2: WD40 domains in WDR11
10. Table S3: BAC clones used for FISH analysis of t(10;12)
11. Table S4: Primers used in this study

## SUPPLEMENTARY FIGURES AND TABLES

**Figure S1: Semi-quantitative RT-PCR analysis in rat tissues**

Total RNA isolated from 11 rat IHH/KS-relevant tissues was used for RT-PCR using rat-specific *Wdr11* primers. 736 bp amplicons were detected in all tissues after 35 cycles; in particular, expression levels were higher in the ovary, testis, olfactory bulb and piri cortex. HPA: hypothalamus preoptic area; MBH: medial basal hypothalamus.

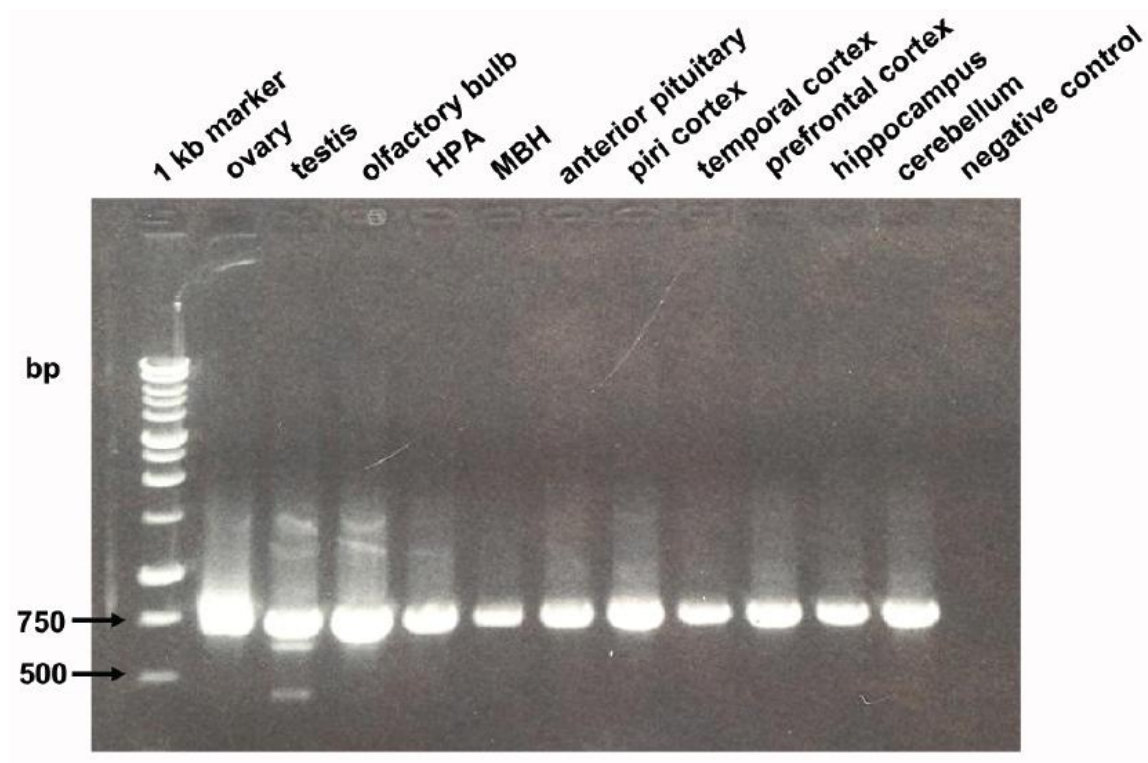

## Figure S2: Evolutionary conservation of the residue Lys978

ClustalW multiple alignment of partial protein sequence of WDR11 orthologs. The position of residue K978 altered by one heterozygous nucleotide change of *WDR11* is marked by arrow and red letters in the corresponding segment of the multiple alignment. The amino acid residues that differ from the sequence of the human WDR11 protein are indicated blue. Lys978 residue is evolutionarily fully conserved in all thirteen available WDR11 orthologs.

|            | K978                            |
|------------|---------------------------------|
| human      | ENAYFQ <b>K</b> FQLERV          |
| chimpanzee | ENAYFQ <b>K</b> FQLERV          |
| cow        | ENAYFQ <b>K</b> FQLERV          |
| horse      | ENAYFQ <b>K</b> FQLERV          |
| panda      | ENAYFQ <b>K</b> FQLERV          |
| pig        | ENAYFQ <b>K</b> FQLERV          |
| dog        | ENAYFQ <b>K</b> FQLERV          |
| rat        | ENAYFQ <b>K</b> FQLERV          |
| mouse      | ENAYFQ <b>K</b> FQLERV          |
| rabbit     | EN <b>T</b> YFQ <b>K</b> FQLERV |
| opossum    | EN <b>S</b> YFQ <b>K</b> FQLERV |
| chicken    | EN <b>H</b> YFQ <b>K</b> FQLERV |
| finch      | EN <b>S</b> YFQ <b>K</b> FQLERV |

**Figure S3: RT-qPCR and western blot analysis of t(10;12)**

(A) *WDR11* mRNA levels in controls and the t(10;12) patient were measured by real time quantitative RT-PCR. Two different sets of primers (*WDR11*-1 and -2) were used to validate *WDR11* mRNA expression, which was normalized against *GAPDH*. The level of *WDR11* mRNA in the t(10;12) patient was reduced by 20% compared to two male controls C1 and C2, suggesting the positional effect of the translocation breakpoint at 10q26.12. The data show the mean of three independent experiments  $\pm$  SD.

(B) The anti-*WDR11* antibody recognizes ~120kDa *WDR11* protein in both male controls (C1 and C2) and t(10;12) lymphoblastoid cell extracts, showing about 10% reduced expression in t(10;12) (arrow).  $\beta$ -actin expression served as the internal loading control.

A

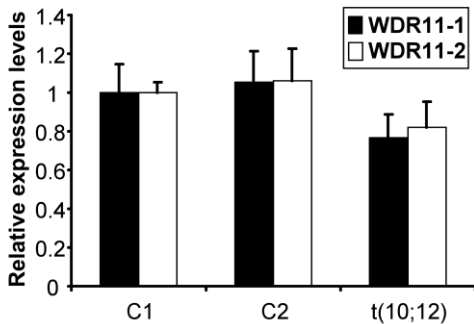

B

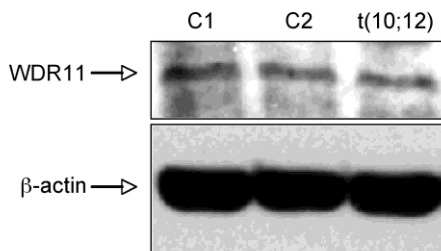

|                               | C1    | C2    | t(10;12) |
|-------------------------------|-------|-------|----------|
| $\beta$ -actin                | 179.8 | 161.3 | 164.7    |
| <i>WDR11</i>                  | 118.7 | 105.8 | 96.8     |
| <i>WDR11</i> / $\beta$ -actin | 0.66  | 0.65  | 0.58     |
| normalized to control         | 1     | 0.99  | 0.89     |

#### **Figure S4: Overlay of 1PGU and WDR11**

When we overlapped two replicas of the model of WDR11 (red) with the structure of 1PGU (blue) we found very good structural agreement, which led to the hypothesis that WDR11 may also dimerize by a similar mechanism involving two zinc coordination sites and might also be an actin binding protein. Because the two protein structures are not identical, deviations arising from their alignment make the position of the zinc ions (orange spheres) uncertain to a few angstroms. The sites of mutations in WDR11 are indicated with yellow spheres. To check our hypothesis we investigated whether WDR11 has a set of zinc-coordinating amino acids in the vicinity a putative zinc position, that we obtain, when we structurally align 1PGU with a dimer of WDR11. Because the two protein structures are not identical, deviations arising from their alignment make the position of the Zn ion uncertain to a few Angstrom. However, Fig. s7 clearly shows that also WDR11 has the required residues (ASP, GLU or HIS) for zinc binding in the vicinity of the putative zinc position. These residues are Asp 377, Glu 384, His 501, His 508, Glu 510. The two units, each of which has two beta propeller elements, are stabilized by two zinc ions as illustrated in Fig. S6<sup>1</sup>. 1PGU contains two zinc binding sites in which a typical pattern of residues (green sticks) coordinates with the zinc ions (orange). Since these residues belong to different chains the zinc coordination acts as a tether stabilizing the dimer.

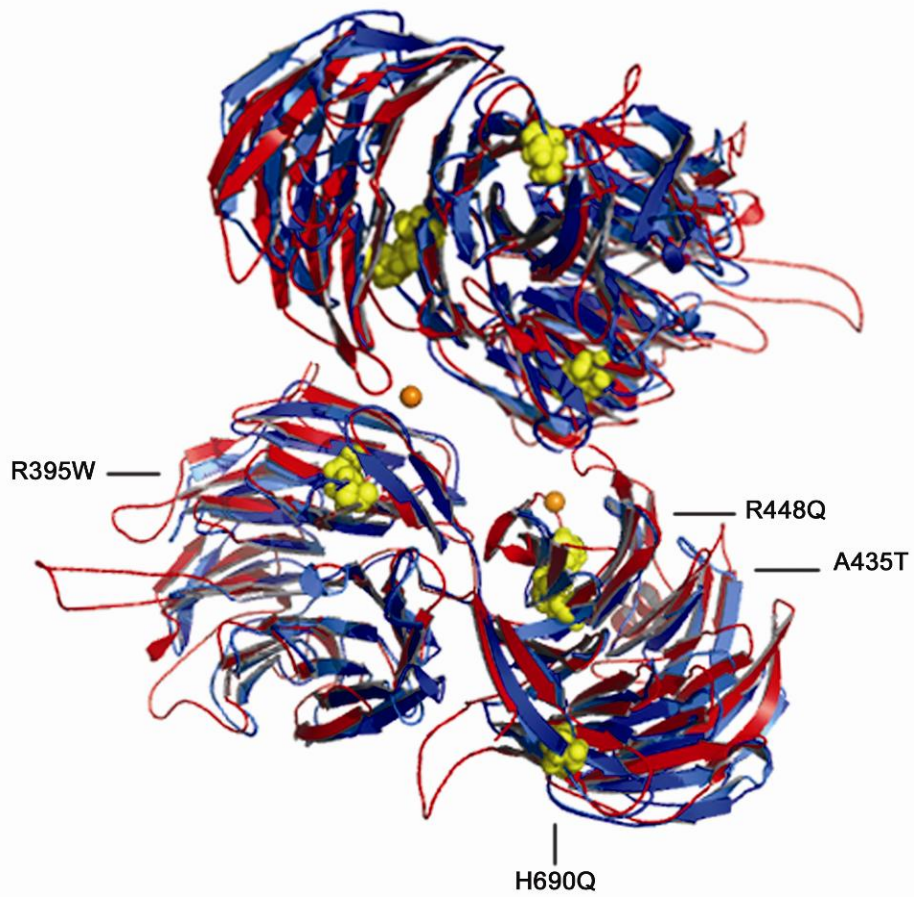

### Figure S5: Protein-protein interaction region of WDR11

We used SPPIDER to detect protein-protein interaction regions (in bright cyan) in the model for WDR11 (non-interacting regions in dark blue), here shown in a view obtained by rotating panel A 90 degrees out of the plane on a horizontal axis. The Figure shows two prominent external interaction regions (labeled inner & outer surface), where WDR11 may interact with multiple other proteins, such as EMX1 or actin, as well as an intramolecular interaction region at the interface of the two propeller units. Four mutations (those that are visible are illustrated with orange sidechains and labeled) lie within protein-protein interaction regions of WDR11 and may thus directly influence binding to EMX1.

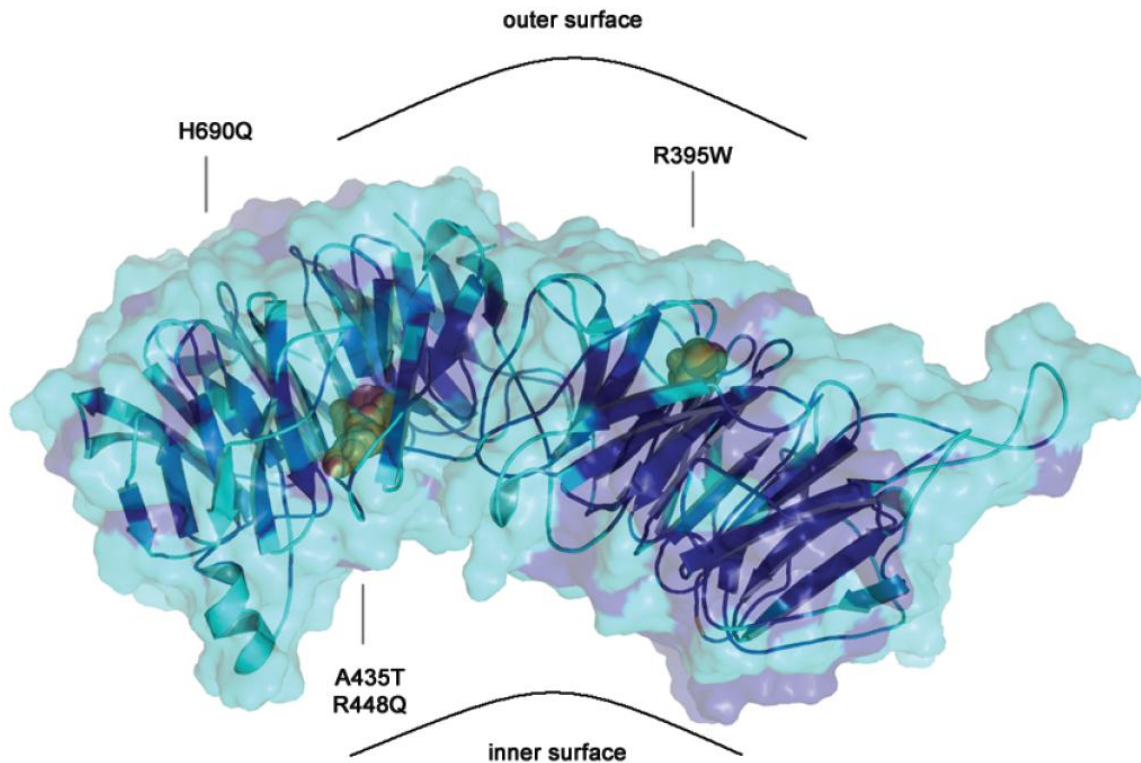

### Figure S6: Two zinc ion binding sites of 1PGU

We have identified other beta-propeller proteins that are highly homologous to WDR11, in particular, actin-interacting protein 1 (pdb code 1PGU), which is comprised of a dimer of two double propeller units that are present in 1NR0 and WDR11. The two units, each of which has two  $\beta$ -propeller elements, are stabilized by two zinc ions (shown in orange) as illustrated here <sup>1</sup>. Zinc ions in proteins are coordinated by a highly conserved set of amino acids, most commonly His, Glu, Asp and Cys <sup>2</sup>. The experimental structure of 1PGU shows the interaction between zinc and amino acids Asp, His and Glu. Both Zn ions are stabilized by residues coming from different molecules in the dimer and they therefore act as tethers that hold the dimer together.

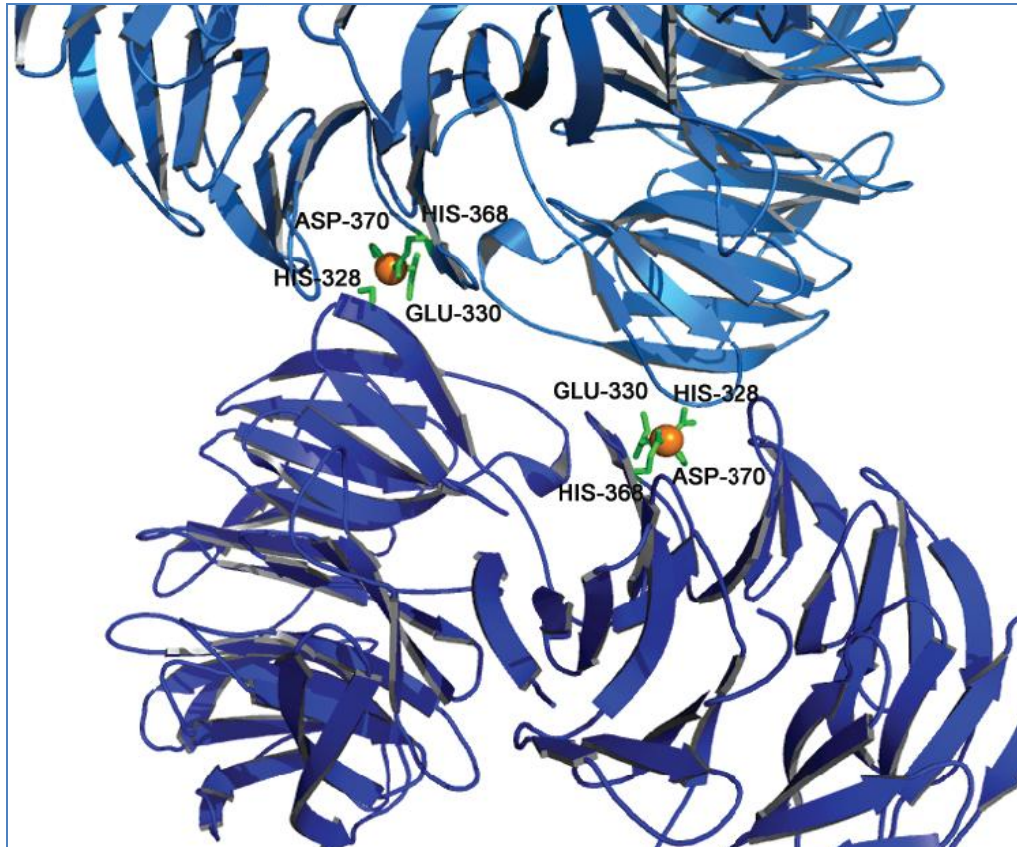



**Figure S7: Glu, His and Asp residues in the model of WDR11 in the vicinity of the proposed zinc position based upon 1PGU**

A single unit of the proposed dimer is shown. The presence of the required set of amino acids demonstrates that WDR11 might also bind zinc and form a dimer that is stabilized by the same mechanism as 1PGU. WDR11 has the required residues (Asp 377, Glu 384, His 501, His 508, Glu 510) for zinc binding in the vicinity of the putative zinc position.

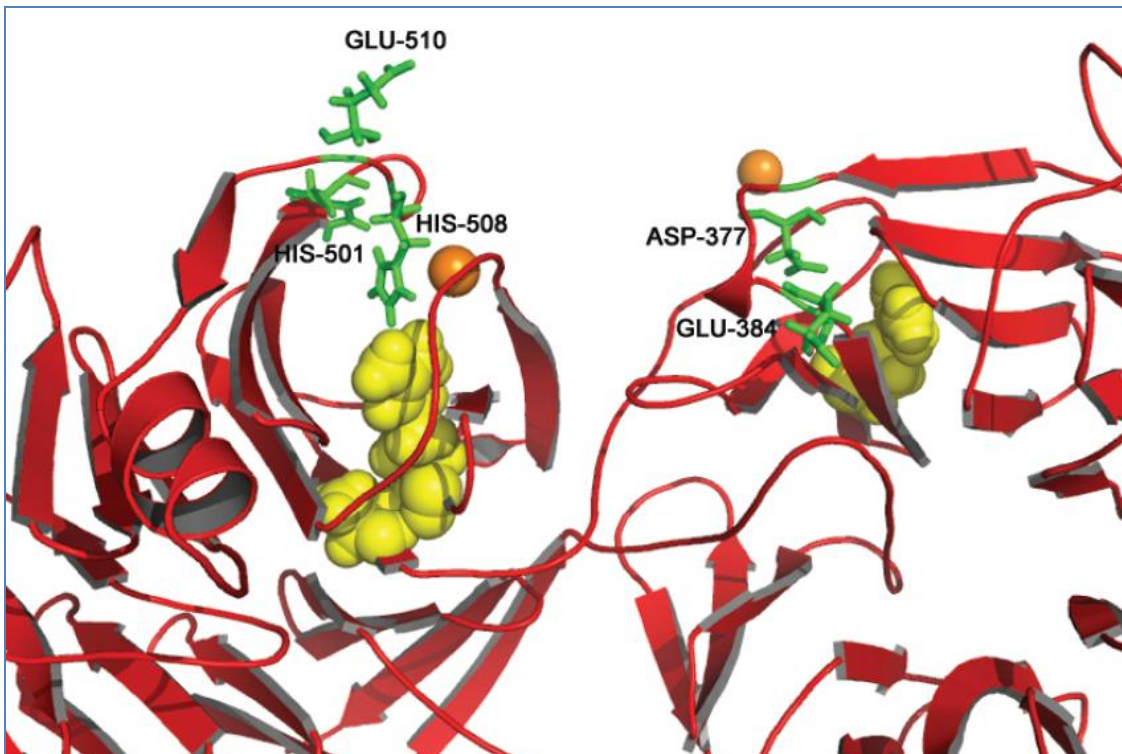

**Table S1: SNPs of *WDR11* (NM\_018117.11) found in IHH/KS patients and normal controls**

| Location  | Nucleotide change | Amino-acid change | Frequency of second allele in patients | dbSNP or frequency of second allele in normal controls |
|-----------|-------------------|-------------------|----------------------------------------|--------------------------------------------------------|
| exon 1    | c.-6G>A           | –                 | 3/402                                  | rs17100985<br>5/96 (1) <sup>a</sup>                    |
| exon 1    | c.51G>T           | Gly17Gly          | 3/402                                  | rs35692153<br>4/96 (1) <sup>a</sup>                    |
| intron 2  | IVS2-7G>C         | –                 | 91/402 (8) <sup>a</sup>                | rs2241846<br>17/96 (5) <sup>a</sup>                    |
| exon 6    | c.834G>A          | Thr278Thr         | 164/402 (31) <sup>a</sup>              | rs10886789<br>32/96 (7) <sup>a</sup>                   |
| exon 6    | c.789C>G          | Leu263Leu         | 1/402                                  | 0/96                                                   |
| exon 8    | c.1066G>A         | Val356Ile         | 0/402                                  | rs34304988<br>3/936                                    |
| exon 8    | c.1113C>T         | Ala371Ala         | 1/402                                  | rs41287986<br>2/936                                    |
| exon 10   | c.1425G>A         | Pro475Pro         | 0/402                                  | 6/1466                                                 |
| exon 11   | c.1542C>T         | His514His         | 5/402                                  | rs12355108<br>2/96                                     |
| intron 12 | IVS12+25G>A       | –                 | 6/402 (1) <sup>a</sup>                 | rs7923412<br>2/96                                      |
| intron 13 | IVS13+11A>C       | –                 | 1/402                                  |                                                        |
| exon 15   | c.1899A>T         | Ala633Ala         | 169/402 (35) <sup>a</sup>              | rs7899928<br>40/96 (10) <sup>a</sup>                   |
| exon 18   | c.2304A>G         | Ala768Ala         | 76/402 (5) <sup>a</sup>                | rs2289337<br>19/96 (2) <sup>a</sup>                    |
| intron 18 | IVS18-9C>T        |                   | 1/402                                  | 1/548                                                  |
| intron 21 | IVS21+48A>C       | –                 | 1/402                                  | 0/96                                                   |
| intron 21 | IVS21-5C>G        | –                 | 1/402                                  | 1/456                                                  |
| intron 23 | IVS23-48C>T       | –                 | 2/402                                  | 1/456                                                  |
| intron 23 | IVS23-30G>C       | –                 | 2/402                                  | 7/648 (2) <sup>a</sup>                                 |
| exon 24   | c.2932A>C         | Lys978Gln         | 1/402                                  | 2/1174                                                 |
| exon 24   | c.2958A>G         | Leu986Leu         | 163/402 (29) <sup>a</sup>              | rs1652727<br>216/648 (38) <sup>a</sup>                 |
| intron 26 | IVS26+11C>T       | –                 | 7/402                                  | 3/456                                                  |
| intron 26 | IVS26+39C>T       | –                 | 259/402 (72) <sup>a</sup>              | rs1866516<br>279/456 (87) <sup>a</sup>                 |
| intron 26 | IVS26-12C>T       | –                 | 1/402                                  | no SNP data                                            |

|         |           |            |                         |                                     |
|---------|-----------|------------|-------------------------|-------------------------------------|
| exon 27 | c.3318C>T | Ala1106Ala | 1/402                   | 1/96<br>rs34937000                  |
| exon 27 | c.3363C>G | Val1121Val | 73/402 (2) <sup>a</sup> | rs3740307<br>12/96 (3) <sup>a</sup> |
| exon 27 | c.3393C>T | Leu1131Leu | 1/402                   | rs12268298<br>4/96 (1) <sup>a</sup> |

<sup>a</sup>Total number of homozygotes among the individuals screened

**Table S2: WD domains in WDR11**

WD domains in WDR11 predicted based upon the structural model (WD domains from 2 to 10) and confidently predicted from the server SMART (WD domains 1, 11, and 12)

| Number | Name | Begin | End | Size (AA) | E-value | Blast Confirmation |
|--------|------|-------|-----|-----------|---------|--------------------|
| 1      | WD   | 50    | 99  | 50        | 0.04    | Begin/end 50-99    |
| 2      | WD   | 126   | 164 | 39        | —       | —                  |
| 3      | WD   | 220   | 274 | 55        | —       | —                  |
| 4      | WD   | 277   | 324 | 48        | —       | —                  |
| 5      | WD   | 335   | 374 | 40        | —       | —                  |
| 6      | WD   | 428   | 467 | 40        | —       | —                  |
| 7      | WD   | 561   | 605 | 45        | —       | —                  |
| 8      | WD   | 609   | 646 | 38        | —       | —                  |
| 9      | WD   | 652   | 691 | 40        | —       | —                  |
| 10     | WD   | 708   | 736 | 29        | —       | —                  |
| 11     | WD   | 738   | 778 | 41        | 10.30   | 738-778            |
| 12     | WD   | 781   | 822 | 42        | 13.80   | 781-822            |

**Table S3: BAC clones used for FISH analysis of t(10;12)**

FISH result of BACs from Chromosome 10q26 (coordinates are from NCBI Build 36/hg18 assembly of UCSC Genome Browser)

| No. | BAC ID      | Start (bp)  | End (bp)    | Proximal | Spanning | Distal |
|-----|-------------|-------------|-------------|----------|----------|--------|
| 1   | RP11-592D19 | 118,702,524 | 118,893,472 | X        |          |        |
| 2   | RP11-714M16 | 121,088,268 | 121,281,904 | X        |          |        |
| 3   | RP11-717L13 | 121,765,054 | 121,963,545 | X        |          |        |
| 4   | RP11-254K03 | 121,923,506 | 122,098,857 |          | X        |        |
| 5   | RP11-572P18 | 122,039,380 | 122,255,369 |          |          | X      |
| 6   | RP11-313F09 | 122,302,049 | 122,499,951 |          |          | X      |
| 7   | RP11-499E06 | 122,574,466 | 122,745,931 |          |          | X      |
| 8   | RP11-152I12 | 122,709,923 | 122,891,863 |          |          | X      |
| 9   | RP11-604B15 | 122,847,905 | 123,036,763 |          |          | X      |
| 10  | RP11-251P02 | 122,860,000 | 123,009,780 |          |          | X      |
| 11  | RP11-753P11 | 123,034,946 | 123,207,777 |          |          | X      |
| 12  | RP11-300A10 | 123,166,882 | 123,350,993 |          |          | X      |
| 13  | RP11-7N04   | 123,407,405 | 123,552,165 |          |          | X      |
| 14  | RP11-105F10 | 123,764,473 | 123,939,046 |          |          | X      |
| 15  | RP11-619E04 | 124,103,531 | 124,311,827 |          |          | X      |
| 16  | RP13-63P20  | 124,872,781 | 125,056,306 |          |          | X      |
| 17  | RP11-47H10  | 125,699,910 | 125,916,390 |          |          | X      |
| 18  | RP11-8D22   | 130,325,185 | 130,493,639 |          |          | X      |
| 19  | RP11-91E2   | 135,150,439 | 135,301,208 |          |          | X      |

FISH result of BACs from Chromosome 12q12-12q13 (coordinates are from NCBI Build 36/hg18 assembly of UCSC Genome Browser)

| No. | BAC ID      | Start (bp) | End (bp)   | Proximal | Spanning | Distal |
|-----|-------------|------------|------------|----------|----------|--------|
| 1   | RP11-88L2   | 42,459,839 | 42,629,204 | X        |          |        |
| 2   | RP11-462E15 | 42,875,295 | 43,061,579 | X        |          |        |
| 3   | RP11-424H10 | 43,693,902 | 43,853,320 | X        |          |        |
| 4   | RP11-19E18  | 44,441,691 | 44,596,850 | X        |          |        |
| 5   | RP11-659M15 | 44,897,959 | 45,111,797 | X        |          |        |
| 6   | RP11-755G20 | 45,222,971 | 45,399,371 | X        |          |        |
| 7   | RP11-618L22 | 45,523,763 | 45,703,378 | X        |          |        |
| 8   | RP11-72L16  | 45,581,486 | 45,734,180 | X        |          |        |
| 9   | RP11-23J18  | 45,755,428 | 45,925,226 | X        |          |        |
| 10  | RP11-479I2  | 45,789,177 | 45,975,868 | X        |          |        |
| 11  | RP11-677P12 | 45,813,066 | 45,983,115 | X        |          |        |
| 12  | RP11-71G17  | 45,875,143 | 46,046,421 | X        |          |        |
| 13  | RP11-464D5  | 45,880,805 | 46,073,952 |          | X        |        |
| 14  | RP11-543D1  | 46,000,452 | 46,161,075 |          |          | X      |
| 15  | RP11-648F12 | 46,021,097 | 46,184,193 |          |          | X      |
| 16  | RP11-379M8  | 46,074,480 | 46,267,797 |          |          | X      |
| 17  | RP11-650J13 | 46,467,143 | 46,641,379 |          |          | X      |
| 18  | RP11-204C20 | 46,894,554 | 47,075,616 |          |          | X      |
| 19  | RP11-141C14 | 50,423,519 | 50,612,911 |          |          | X      |
| 20  | RP11-762I7  | 54,296,170 | 54,469,906 |          |          | X      |

**Table S4: Primers used in this study**

| Semi-quantitative RT-PCR in rat tissues (rat <i>WDR11</i> ; XM_219377.5) |                                                       |
|--------------------------------------------------------------------------|-------------------------------------------------------|
| Forward primer                                                           | 5'-GACCTTGAAGTGAATCAAACAGTTGGCGTGATTGCAATTGAGCGAAC-3' |
| Reverse primer                                                           | 5'-CACACGAGTGGACGCTTAGCTCCTTGTGTAGCAGACC-3'           |
| Amplicon size                                                            | 736 bp                                                |
| Annealing temperature                                                    | 68 °C                                                 |

| <i>WDR11</i> mutant constructs |        |                                     |                                                    |
|--------------------------------|--------|-------------------------------------|----------------------------------------------------|
| WDR11 mutants                  | Type   | Outside primers                     | Mutant primers                                     |
| m1                             | R395W  | F01: 5'-<br>GCTATCCACCCGCCAAATTA-3' | 1183_mR1: 5'-<br>TACTGTTCCATGAATTTGATTACAAACTG-3'  |
|                                |        | R01: 5'-<br>CTGCTCACCATCTGAACCTC-3' | 1183_mF1: 5'-<br>CGAAATTCATGGAACAGTAGTTCTGGTGTG-3' |
| m2                             | A435T  | F01: 5'-<br>GCTATCCACCCGCCAAATTA-3' | 1303_mR1: 5'-<br>CAGCAATTGTACTTTGCCCAATCATGTTAT-3' |
|                                |        | R01: 5'-<br>CTGCTCACCATCTGAACCTC-3' | 1303_mF1: 5'-<br>GGGCAAAGTACAATTGCTGGGGAAGAACAT-3' |
| m3                             | R448Q  | F01: 5'-<br>GCTATCCACCCGCCAAATTA-3' | 1343_mR1: 5'-<br>TGCACTTCCTGCAGAATTGAACCTCTGGGA-3' |
|                                |        | R01: 5'-<br>CTGCTCACCATCTGAACCTC-3' | 1343_mF1: 5'-<br>CAATTCTGCAGGAAGTGCACCTCAAGTTCC-3' |
| m4                             | H690Q  | F01: 5'-<br>GCTATCCACCCGCCAAATTA-3' | 2070_mR1: 5'-<br>AACAGTGAGTTGATACACTTGGCCATCAAT-3' |
|                                |        | R01: 5'-<br>CTGCTCACCATCTGAACCTC-3' | 2070_mF1: 5'-<br>AGTGTATCAACTCACTGTTGAAGGAAACTC-3' |
| m5                             | F1150L | F06: 5'-<br>ATCGCTTGGAAGGTGATAC-3'  | 3450_mR1: 5'-<br>TGCTCTATCCAAGTATCTCATGCTGTGAAG-3' |
|                                |        | R02: 5'-<br>CTTCAATGGGTTCTTCCTTG-3' | 3450_mF1: 5'-<br>GAGATACTTGGATAGAGCAGCCTTATTTGT-3' |

Y2H and Binding Assay

| Construct                  | Top primer                                  | Bottom primer                                |
|----------------------------|---------------------------------------------|----------------------------------------------|
| pENTR3C-WDR11 1-361 [N]    | 5'- GATGGATCCA TGTTGCCCTA CACAGTG -3'       | 5' - GTAGTCGACC ATACTGAAGG GACGGAC - 3'      |
| pENTR3C-WDR11 362-830 [M]  | 5'- GATGGATCCG TGTGCTGTCC TGTC AAT -3'      | 5' - GATGTCGACA AAGCACGCAG ACTTCAT - 3'      |
| pENTR3C-WDR11 831-1224 [C] | 5'- GATGGATCCA GAATGGATGA ACAAGAG -3'       | 5' - GATGTCGACT CACTCTTCAA TGGGTTC -3'       |
| pENTR3C-WDR11 1-1224       | 5'- GATGGATCCA TGTTGCCCTA CACAGTG -3'       | 5' - GATGTCGACT CACTCTTCAA TGGGTTC -3'       |
| pENTR3C-Emx1 1-290         | 5'- GAT GAA TTC ATG TGC CTG GCT GGG TGC -3' | 5' - GAT CTC GAG CTA GTC ATT GGA GGT GAC -3' |
| pGBKT7-WDR11 1-830         | 5'- GATGGATCCA TGTTGCCCTA CACAGTG -3'       | 5' - GATGTCGACA AAGCACGCAG ACTTCAT - 3'      |

Mouse *in situ* hybridization analysis (NM\_172255.3)

| WDR11 probe              | Forward primer                       | Reverse primer                     |
|--------------------------|--------------------------------------|------------------------------------|
| 641-1035 of NM_172255.3  | 5'- GAATTCGGGAAGAAAGTGTACATCTCCAG-3' | 5'-TCTAGATCATTTGATGTAGTACAGATGC-3' |
| 2892-3492 of NM_172255.3 | 5'- GAATTCTAACCAAGGAAGGTGCTCCTAA-3'  | 5'-TCTAGATATCTCATGCTGTGAAGCGTCT-3' |

Mutation Screening of WDR11 (NM\_018117.11)

| Exon number | Outer primer pair                     | Nested primer pair                   |
|-------------|---------------------------------------|--------------------------------------|
| 1           | F01: 5'-AGAGTGCGGAACCTAG-3'           | F01: 5'-TAGGAAACTGAAGGCAAC-3'        |
|             | R01: 5'-GGCTATTATCACTTTTGTAAACA-3'    | R01: 5'-TCATTGCGTGAGGGC-3'           |
| 2           | F02: 5'-CAGATCTTTTATTTAAGTGGGATA-3'   | F02: 5'-ATAAATACTGGCCTTTGGG-3'       |
|             | R02: 5'-ATGATCTAACAACCTAGCATTTAATA-3' | R02: 5'-CCTGTATTGACATTAAGTCATATA-3'  |
| 3           | F03: 5'-CCTTCAAATGAAAACCAAGTTT-3'     | F03: 5'-TCTGTTTATTCTTGCTAAATGTTTA-3' |
|             | R03: 5'-ATTTAGATCAGCAGAATAGG-3'       | R03: 5'-CAATCAAGAGCTAACTTGA-3'       |
| 4           | F04: 5'-ATTAGTTTTTCTCTGGAATATTGA-3'   | F04: 5'-ACATTTGGGGCTGGTG-3'          |
|             | R04: 5'-GACTAGACATGCTTCTC-3'          | R04: 5'-CTTCGCTCAGTCATTTAAC-3'       |
| 5           | F05: 5'-TAATGGACCACCTGTTTCT-3'        | F05: 5'-TTAGAGAACATTCCCATTATGTT-3'   |
|             | R05: 5'-AAAGGCAATGTAAATGCTGAA-3'      | R05: 5'-TTAGGGCAGGGGACAA-3'          |
| 6           | F06: 5'-GATGCCAACCCATGTT-3'           | F06: 5'-ACTTCAGGGAATAGTTGTAC-3'      |
|             | R06: 5'-AAAAACAATCTAAAATAGTGTGCT-3'   | R06: 5'-CTAGTCTTTTGATAAATTGAAAAG-3'  |

|    |                                      |                                       |
|----|--------------------------------------|---------------------------------------|
| 7  | F07: 5'-ATCCTGAGATATTTATTGAACTATT-3' | F07: 5'-AGTCACATGGGTAAAGACAA-3'       |
|    | R07: 5'-TCAAGAGATTAATCTTGGGC-3'      | R07: 5'-GCTTATACTTTTTATGCCTCTTAT-3'   |
| 8  | F08: 5'-TAATTGTAAAAAGTGAAGCCATG-3'   | F08: 5'-TGACATTGCATTCATGAAGG-3'       |
|    | R08: 5'-ATAGGTGAAATAGCTCTAGC-3'      | R08: 5'-GCAGATTTACATAATCCCTAATA-3'    |
| 9  | F09: 5'-GAGGGCTGGTTTTCTATAA-3'       | F09: 5'-TGCTAGAGCTATTTACC-3'          |
|    | R09: 5'-GGCACTTTTCTACCTAAGTA-3'      | R09: 5'-CTCTGATTTATTTAGGAAAGAATG-3'   |
| 10 | F10: 5'-AGTCATTGTGTCCTTAATAAC-3'     | F10: 5'-CAGCCACTAAAGTACTACAT-3'       |
|    | R10: 5'-CAGTTGGAATAAAAGGACAG-3'      | R10: 5'-ATGAGTATTTACAGTTTCACTTAG-3'   |
| 11 | F11: 5'-ATTTTTTTTATAAGGAAGTGGACC-3'  | F01: 5'-CAGAGAAATTCATTCTTCTTTGT-3'    |
|    | R11: 5'-TCTACTGCTTATGTTCTTTAC-3'     | R01: 5'-ATCCTTGATTAACATAGCCATT-3'     |
| 12 | F12: 5'-GTATGGTAATACAGTCTCAA-3'      | F12: 5'-CAAATAAAAGGTCATGTTAAGATAA-3'  |
|    | R12: 5'-TAAACAATGATGAGGCCTTT-3'      | R12: 5'-TTCTAGGGCAATTATTAGAGAATA-3'   |
| 13 | F13: 5'-CCGAAAAACAGAAACAGATT-3'      | F13: 5'-AAAAAACAGAAACAGATTAGAAGC-3'   |
|    | R13: 5'-GTTACTTCATCTTTTTAGAAGTAG-3'  | R13: 5'-GAATTAAGTGTAGCAACTTAAT-3'     |
| 14 | F14: 5'-GAGCTTTACCTTCTTATGAC-3'      | F14: 5'-TTAATCATGGTGCTAAATGG-3'       |
|    | R14: 5'-CCAAGAAAATAAGAATTATCTCCA-3'  | R14: 5'-CATTTATTTAGATCATCTTCTCTG-3'   |
| 15 | F15: 5'-AGCCTTTCTCTAAGTAGGTA-3'      | F15: 5'-TAAAATCTAAGAACAAATGTGGA-3'    |
|    | R15: 5'-ATTATCTTTTTAGTAATCTGGGTAT-3' | R15: 5'-ATGTACTGAAAGATGAAACTAAGT-3'   |
| 16 | F16: 5'-GCTGTTAAGGAGTGATTCAT-3'      | F16: 5'-CATAATTAGCTGGGCAAATAT-3'      |
|    | R16: 5'-AGTATGGAACAAGTTTAATCG-3'     | R16: 5'-TCGATAATATCTCCTTAAATAAAGT-3'  |
| 17 | F17: 5'-GATAGGCAATGTAGCTCTT-3'       | F17: 5'-TTTGTTAGTGTCTAAAGTCTGTTT-3'   |
|    | R17: 5'-GCAGGAGAATGGCATGA-3'         | R17: 5'-CGGGAGTCAGAGCTT-3'            |
| 18 | F18: 5'-GACCTTAAAGGGCAGG-3'          | F18: 5'-TGTCAGATGTGGCCC-3'            |
|    | R18: 5'-GGTCTCAGAGACAGTG-3'          | R18: 5'-AGTTGTTACCTTTAGAACAACAAAT-3'  |
| 19 | F19: 5'-TGGAAGATAGATTGCCAG-3'        | F19: 5'-GCTGTTCAAGTTCTAAACTTG-3'      |
|    | R19: 5'-ACTCAAGCTTCAAGTTAATATATTT-3' | R19: 5'-AAACTCAGATTCTAAGAAAATAAGA-3'  |
| 20 | F20: 5'-AGACTCTCTCTGCTCTT-3'         | F20: 5'-TAAGCGGTGACTACATTGAA-3'       |
|    | R20: 5'-TTCCACAAAGGCCCGA-3'          | R20: 5'-GCAATTCTGTAGTGTCTCT-3'        |
| 21 | F21: 5'-CTCAATAAGATAAAAGCAGATATTA-3' | F21: 5'-GGTCCTGAGTAGATTG-3'           |
|    | R21: 5'-CTCTGTCACTGTAACACTAC-3'      | R21: 5'-CTGAATAAGTACTTTTTCTGCAA-3'    |
| 22 | F22: 5'-AGAACACTCTCAGCCC-3'          | F22: 5'-CTTCAACTTTTATAATTTTCAAGGGT-3' |
|    | R22: 5'-CTAGATCTCACATTTAAATGCA-3'    | R22: 5'-CAATTTGATTTTTCCCTATTTGTT-3'   |
| 23 | F23: 5'-CTTTCACCCTGTCAGG-3'          | F23: 5'-CCAGTATCCCAGTGG-3'            |
|    | R23: 5'-CAAATGTACCGAGGGC-3'          | R23: 5'-GGCTTATTTCTATTACTGAAC-3'      |
| 24 | F24: 5'-GATAATATCTATCAACATTTTTGCT-3' | F24: 5'-TTCAAATTCTTATTAATGTTTGGG-3'   |
|    | R24: 5'-TTTTTCTCATGAGGTTTATTGGTA-3'  | R24: 5'-GTATTATTTGAAAGAAAGCCTAAA-3'   |
| 25 | F25: 5'-TAGTGTAGCACCTCTG-3'          | F25: 5'-CTGTTAATGTTTGTATTTGTAAAC-3'   |
|    | R25: 5'-ACAGTCTGGAGAATAAGTAG-3'      | R25: 5'-ATAGTTCTCTCACAGGTTTTAT-3'     |
| 26 | F26: 5'-TACCCTGGTTACTTGAG-3'         | F26: 5'-GAGTAATAACAGTAAACTCTTAAT-3'   |
|    | R26: 5'-GATCCATTTTTAAATAAGTAATGCA-3' | R26: 5'-ACTCATAAAGAATAGGAAAAGG-3'     |
| 27 | F27: 5'-CAGAGTATGCAGCAGCT-3'         | F27: 5'-GGCAGTGTGCTAGTCA-3'           |
|    | R27: 5'-AGTTCCATTCTCCTTTGG-3'        | R27: 5'-TTGACAAACCTGAAATGTATACTT-3'   |
| 28 | F28: 5'-CTGTAGATTTTTGTGTATTTAAACT-3' | F28: 5'-TGAGTATTTCCCTCCTT-3'          |
|    | R28: 5'-TGCAGCCACCTTCTTAT-3'         | R28: 5'-TGATTCTTTGTCTCTAATTTCT-3'     |
| 29 | F29: 5'-AAAAGTCTCCTGTGTTTCATC-3'     | F29: 5'-ACACCAGGTCCCTTC-3'            |
|    | R29: 5'-GGCACACATAGTCTTAGAA-3'       | R29: 5'-TCAAACAGCTCACAGG-3'           |



| Confirmation of <i>WDR11</i> missense mutations |          |                                                         |                                                              |
|-------------------------------------------------|----------|---------------------------------------------------------|--------------------------------------------------------------|
| Mutation                                        | Location | Forward primer                                          | Reverse primer                                               |
| R395W                                           | Exon 8   | 5'-<br>CCATGCTTGACATTGCATTCATGAAGGA<br>GTGATGC-3'       | 5'-<br>CTTAAAATCTGCATTACGTATTAGGAAT<br>TCAAAGTATTAAGTCCAG-3' |
| A435T                                           | Exon 10  | 5'-<br>GATGCAATTTAAGTCCTATAGCCAGGTA<br>CAGAGTC-3'       | 5'-<br>GCATTCCAATTCAATATAAGACAGTTGG<br>AATAAAAGGACAG-3'      |
| R448Q                                           | Exon 10  | 5'-<br>GTGTCCTTAATAACTACAGCCACTAAAG<br>TACTACATTAAC-3'  | 5'-<br>GAGTATTTACAGTTTCACTTAGTCTCTAT<br>CTCCTTTTAAAGC-3'     |
| H690Q                                           | Exon 16  | 5'-<br>CATGTTTACCCATAATTAGCTGGGCAA<br>TATTAGTTTCAGAC-3' | 5'-<br>GCTGGATAACTTTGGGAAAGTTACTTAT<br>TCTCCCACAG-3'         |
| F1150L                                          | Exon 28  | 5'-<br>GCTTGTGTTTGGAGATGTGAGTATTCTT<br>CCCTC-3'         | 5'-CTTCCTGCCTCCCTCCATCCTAGTC-3'                              |

| Long Range PCR for der(12) junction fragment |                                                             |
|----------------------------------------------|-------------------------------------------------------------|
| Forward primer                               | Primer sequence                                             |
| 12q13.2-10kb-4208f                           | 5'-CTCATATGTTTTCAAGAGGATCTTCTCAATATAACAATGTGTAGCTTAT-3'     |
| 12q13.2-10kb-4562f                           | 5'-CTGCAACGATGAACAGATCAGAATAGGCGACATGC-3'                   |
| 12q13.2-10kb-5338f                           | 5'-GTTATATTGAAGCGTGAAATATTGATTACAATTTTGAAGCATAAAATATATCG-3' |
| 12q13.2-10kb-5961f                           | 5'-ATATTCTGTGCTTCAAAATAGTTGTAATCAATATTTGACACTTCAATATAAC-3'  |
| 12q13.2-10kb-7351f                           | 5'-GTAATGACTTACTCACACCCCTGCCCACTCTAAC-3'                    |
| Reverse primer                               | Primer sequence                                             |
| 10q26-10kb-3497r                             | 5'-CAAAAGCTGGAGTGGCATTACTACTAAGTAACAGGTAGAACAAAAAC-3'       |
| 10q26-10kb-5710r                             | 5'-CCCTGGTTTAAATGTTTCTGCATTGCCTAAACAATGAGATTTAAAC-3'        |
| 10q26-10kb-5750r                             | 5'-CTAGAGTTGTCTTCTGGATAGCCAGAACTGATCACC-3'                  |
| Long Range PCR for der(10) junction fragment |                                                             |
| Forward primer                               | Primer sequence                                             |
| 10q26-10kb-1851f                             | 5'-CTGTAGGTCAAGCCTTTAATACCCTCCTATTAGAGGG-3'                 |
| 10q26-10kb-2367f                             | 5'-GCCAAAAAATGTTAGCCATTATTACAGAGTATTCAGGAGTTCAG-3'          |
| 10q26-10kb-2801f                             | 5'-ATCTACTTTATAAGGTCATGATGAACACTAGATTTAGCATGTGGTAAG-3'      |
| 10q26-10kb-2851f                             | 5'-CCATGAAAATTTGCAGTATTATTATAGCAGTTGGAGGCCATG-3'            |
| 10q26-10kb-2914f                             | 5'-GTATTGTGAAGAGGTCAAAGCCAGGCTGCAGAG-3'                     |

| Reverse primer     | Primer sequence                                             |
|--------------------|-------------------------------------------------------------|
| 12q13.2-10kb-7630r | 5'-CTGGACATTGGGTATCAAATTGCTGATACCCTGATCTG-3'                |
| 12q13.2-10kb-8180r | 5'-CGATCTCAGCTCACTGCAACCTCTGTCTCC-3'                        |
| 12q13.2-10kb-8836r | 5'-GCTATGTAAGCAGTTATCAGCAATTTGACCCAGTC-3'                   |
| 12q13.2-10kb-9664r | 5'-CTGTATACTTTCTGTCTTCATTTTATATCATCATTCCATGTTTTGAAAAAGTT-3' |
| 12q13.2-10kb-9890r | 5'-GCTCAATTATAAAAGGAAAGTTGATTCTAGATAGGAGCAGGCCATTG-3'       |

| Zebrafish <i>wdr11</i> gene (XM_682139.3) isolation by RT-PCR |                                       |
|---------------------------------------------------------------|---------------------------------------|
| Forward primer                                                | Reverse primer                        |
| 5'-CGGGATCCGCCAAAACATTCCACCTTTTCAT-3'                         | 5'-CACCATGGAGTCCATATCCTGAATGGGTTTG-3' |

| RT-qPCR of <i>WDR11</i> in balanced translocation patient |                                               |
|-----------------------------------------------------------|-----------------------------------------------|
| Primer                                                    | Primer sequence                               |
| WDR11-RT-3117f                                            | 5'-GCAACCCACTGGATATATGCTATGACGTGCTCTG-3'      |
| WDR11-RT-3213r                                            | 5'-GACCGTTTCACTTCCTGTAGATTAACCCTTTCTAGCTG-3'  |
| WDR11-RT-3221f                                            | 5'-GATCATACAAGGAAATGTACAGACCAGCTACTGCTCTTG-3' |
| WDR11-RT-3370r                                            | 5'-GCCTGACGAGGTGACAGTAGTGACTAACAGG-3'         |

## References

1. Voegtli, W.C., Madrona, A.Y. & Wilson, D.K. The structure of Aip1p, a WD repeat protein that regulates Cofilin-mediated actin depolymerization. *J Biol Chem* **278**, 34373-9 (2003).
2. Auld, D.S. Zinc coordination sphere in biochemical zinc sites. *Biometals* **14**, 271-313 (2001).
